# Supplementary material
Source: publisher figshare collection journal article supplement (https://frontiersin.figshare.com/ndownloader/files/21900741)

**Table S1: Composition of standard (control) and experimental inulin-supplemented diet.** Both diets were pre-mixed, and balanced for crude protein and energy content. Purified long-chain inulin contained average DP  $\geq$  23.

| Ingredient (g/kg)               | Standard | Inulin |
|---------------------------------|----------|--------|
| Barley                          | 577      | 293    |
| Wheat                           | 163      | 290    |
| Inulin <sup>1</sup>             | -        | 100    |
| Soybean meal                    | 202      | 228    |
| Palm oil distillate fatty acids | 15       | 30     |
| Molasses                        | 15       | 12     |
| Calcium carbonate               | 13       | 13     |
| Calcium phosphate               | 7        | 7      |
| Sodium chloride                 | 3        | 4      |
| L-lysine hydrochloride          | 2        | 2      |
| Methionine                      | 1        | 1      |
| Vitamin mix                     | 2        | 2      |
| <b>Calculated composition</b>   |          |        |
| Crude protein (g/kg)            | 160      | 160    |
| Metabolisable Energy (MJ/kg)    | 12.59    | 12.47  |
| <b>Analysed composition</b>     |          |        |
| Dry matter (%)                  | 90.7     | 91.1   |
| Fat (%)                         | 4.1      | 5.1    |
| Crude Fibre (%)                 | 3        | 3      |
| Ash (%)                         | 5.2      | 5.1    |
| Lysine (%)                      | 0.97     | 0.95   |
| Methionine (%)                  | 0.27     | 0.27   |
| Calcium (%)                     | 0.74     | 0.73   |
| Phosphorous (%)                 | 0.48     | 0.46   |
| Sodium (%)                      | 0.16     | 0.17   |
| Crude protein (g/kg)            | 162      | 173    |
| Metabolisable Energy (MJ/kg)    | 13.94    | 14.53  |

**Figure S1: Experimental set-up. (A)** A 2-factorial study design illustrates dietary and infection treatment groups. **(B)** Time line of the study.

A

| Diet \ Infection           | Naïve                      | <i>T. suis</i> infection                 |
|----------------------------|----------------------------|------------------------------------------|
|                            |                            |                                          |
| Basal diet                 | <b>Control</b><br>(8 pigs) | <i><b>T. suis</b></i><br>(9 pigs)        |
| 10% Inulin supplementation | <b>Inulin</b><br>(8 pigs)  | <b>Inulin+ <i>T.suis</i></b><br>(9 pigs) |

B

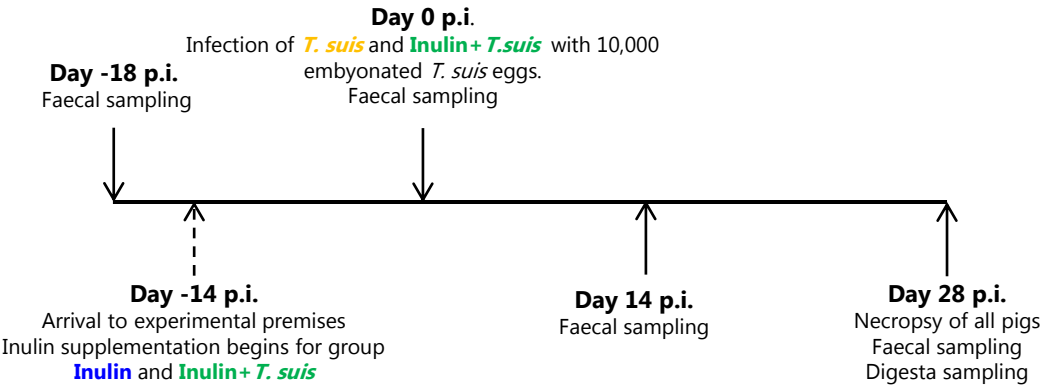

**Table S2: Primer combinations used for PCR1 targeting V3-V4 of the 16S region.** Forward (Fwd) Primer (red) and Fwd inserts (of 5-17 nt length) (green), and reverse (Rev) primer (blue) and Rev inserts (of 6-20 nt length) (orange).

|     | <i>Fwd</i> insert | <i>Fwd</i> primer         |
|-----|-------------------|---------------------------|
| i5  |                   | ACTCCTAYGGGRBGCASCAG      |
|     | CGCAG             | ACTCCTAYGGGRBGCASCAG      |
| i16 | GTGTAGTAATCTGAAT  | ACTCCTAYGGGRBGCASCAG      |
| i17 | TAAGTCGGTAACACTCT | ACTCCTAYGGGRBGCASCAG      |
|     | <i>Rev</i> insert | <i>Rev</i> primer         |
|     |                   | AGCGTGGACTACNNGGGTATCTAAT |
| r6  | GATCAT            | AGCGTGGACTACNNGGGTATCTAAT |
| r12 | CTGAGCCTGCG       | AGCGTGGACTACNNGGGTATCTAAT |
| r20 | TCATCATCAACTCTACT | AGCGTGGACTACNNGGGTATCTAAT |

**Figure S2: Number of species present in each treatment group at (A) each study time point, and (B) in each gut segment at day 28 post-infection (p.i.)** Data are represented as means with minimum and maximum values, and error bars represent SD . (Group C = control; Group Ts = *Trichuris suis*; Group I = Inulin; Group I+Ts = Inulin+*T. suis*. Il = ileum; Ca = caecum; PC = proximal colon; DC = distal colon).

A

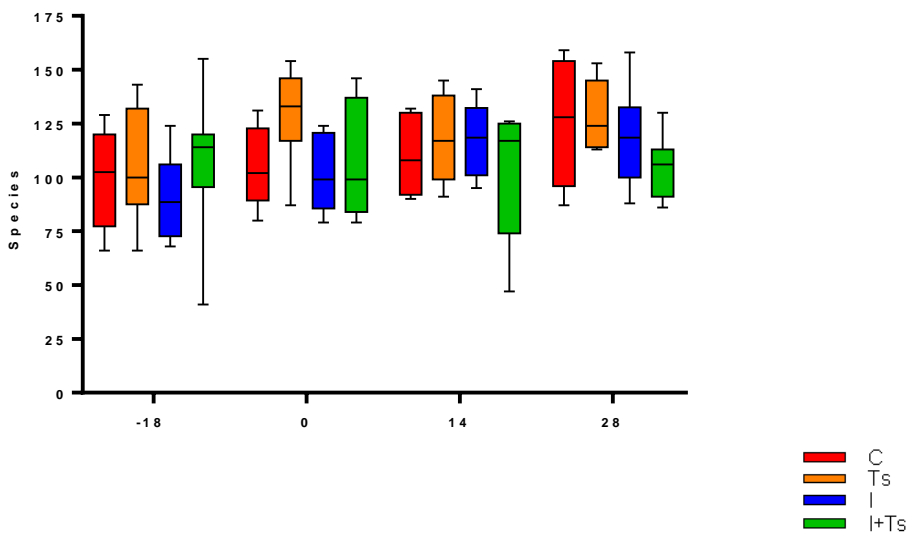

B

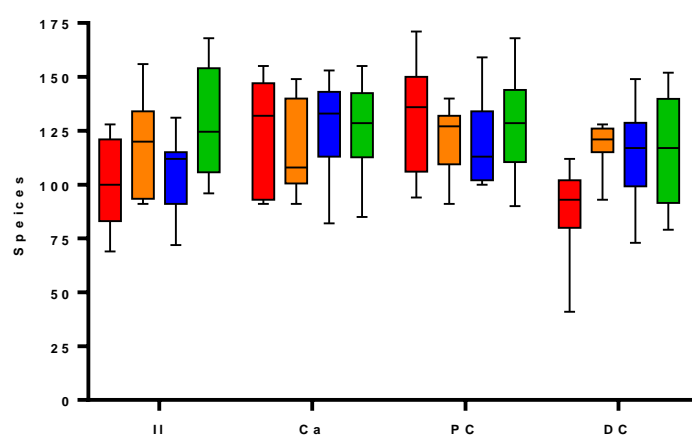

**Table S3: PERMANOVA *p*-values for Sorensen-Dice (S-D) and Bray Curtis (BC) for pair-wise comparisons at (A) between groups as each time point (B) between groups for each intestinal segment (C) between two time points within each group (D) between two intestinal segments within each group. *p*-value < 0.05 is considered significant between the two groups.**

|                |     |                       | Day -18 p.i. |       | Day 0 p.i. |       | Day 14 p.i. |       | Day 28 p.i. |       |
|----------------|-----|-----------------------|--------------|-------|------------|-------|-------------|-------|-------------|-------|
|                |     |                       | S-D          | BC    | S-D        | BC    | S-D         | BC    | S-D         | BC    |
| Control        | vs. | <i>T. suis</i>        | 0.680        | 0.819 | 0.056      | 0.030 | 0.071       | 0.162 | 0.028       | 0.093 |
| Control        | vs. | Inulin                | 0.282        | 0.236 | 0.002      | 0.002 | 0.006       | 0.019 | 0.002       | 0.007 |
| Control        | vs. | Inulin+ <i>T.suis</i> | 0.456        | 0.287 | 0.002      | 0.002 | 0.002       | 0.001 | 0.001       | 0.001 |
| <i>T. suis</i> | vs. | Inulin                | 0.490        | 0.160 | 0.001      | 0.004 | 0.011       | 0.023 | 0.002       | 0.002 |
| <i>T. suis</i> | vs. | Inulin+ <i>T.suis</i> | 0.324        | 0.215 | 0.005      | 0.005 | 0.001       | 0.006 | 0.001       | 0.001 |
| Inulin         | vs. | Inulin+ <i>T.suis</i> | 0.008        | 0.029 | 0.580      | 0.725 | 0.190       | 0.418 | 0.005       | 0.037 |

|                |     |                       | Ileum |       | Caecum |       | Proximal Colon |       | Distal Colon |       |
|----------------|-----|-----------------------|-------|-------|--------|-------|----------------|-------|--------------|-------|
|                |     |                       | S-D   | BC    | S-D    | BC    | S-D            | BC    | S-D          | BC    |
| Control        | vs. | <i>T. suis</i>        | 0.001 | 0.031 | 0.053  | 0.069 | 0.020          | 0.045 | 0.004        | 0.066 |
| Control        | vs. | Inulin                | 0.003 | 0.002 | 0.002  | 0.003 | 0.002          | 0.003 | 0.010        | 0.016 |
| Control        | vs. | Inulin+ <i>T.suis</i> | 0.001 | 0.001 | 0.001  | 0.002 | 0.001          | 0.002 | 0.001        | 0.003 |
| <i>T. suis</i> | vs. | Inulin                | 0.001 | 0.008 | 0.001  | 0.002 | 0.001          | 0.016 | 0.002        | 0.017 |
| <i>T. suis</i> | vs. | Inulin+ <i>T.suis</i> | 0.001 | 0.001 | 0.001  | 0.003 | 0.001          | 0.010 | 0.001        | 0.001 |
| Inulin         | vs. | Inulin+ <i>T.suis</i> | 0.001 | 0.043 | 0.081  | 0.144 | 0.491          | 0.779 | 0.536        | 0.446 |

|              |     |             | Control |       | <i>T. suis</i> |       | Inulin |       | Inulin+ <i>T.suis</i> |       |
|--------------|-----|-------------|---------|-------|----------------|-------|--------|-------|-----------------------|-------|
|              |     |             | S-D     | BC    | S-D            | BC    | S-D    | BC    | S-D                   | BC    |
| Day -18 p.i. | Vs. | Day 0 p.i.  | 0.001   | 0.005 | 0.001          | 0.001 | 0.001  | 0.001 | 0.001                 | 0.001 |
| Day -18 p.i. | Vs. | Day 14 p.i. | 0.002   | 0.001 | 0.001          | 0.001 | 0.001  | 0.011 | 0.001                 | 0.001 |
| Day -18 p.i. | Vs. | Day 28 p.i. | 0.002   | 0.035 | 0.001          | 0.002 | 0.001  | 0.001 | 0.001                 | 0.001 |
| Day 0 p.i.   | Vs. | Day 14 p.i. | 0.091   | 0.014 | 0.058          | 0.330 | 0.869  | 0.370 | 0.005                 | 0.111 |
| Day 0 p.i.   | Vs. | Day 28 p.i. | 0.061   | 0.055 | 0.004          | 0.197 | 0.065  | 0.349 | 0.001                 | 0.026 |
| Day 14 p.i.  | Vs. | Day 28 p.i. | 0.426   | 0.015 | 0.069          | 0.190 | 0.075  | 0.249 | 0.014                 | 0.046 |

|                |     |                | Control |       | <i>T. suis</i> |       | Inulin |       | Inulin+ <i>T.suis</i> |       |
|----------------|-----|----------------|---------|-------|----------------|-------|--------|-------|-----------------------|-------|
|                |     |                | S-D     | BC    | S-D            | BC    | S-D    | BC    | S-D                   | BC    |
| Ileum          | Vs. | Caecum         | 0.001   | 0.002 | 0.001          | 0.001 | 0.002  | 0.002 | 0.001                 | 0.001 |
| Ileum          | Vs. | Proximal colon | 0.002   | 0.001 | 0.001          | 0.001 | 0.002  | 0.001 | 0.001                 | 0.001 |
| Ileum          | Vs. | Distal colon   | 0.001   | 0.001 | 0.001          | 0.001 | 0.002  | 0.002 | 0.001                 | 0.001 |
| Caecum         | Vs. | Proximal colon | 0.982   | 0.814 | 0.894          | 0.996 | 0.930  | 0.579 | 0.942                 | 0.665 |
| Caecum         | Vs. | Distal colon   | 0.005   | 0.026 | 0.226          | 0.086 | 0.178  | 0.021 | 0.001                 | 0.039 |
| Proximal colon | Vs. | Distal colon   | 0.014   | 0.04  | 0.077          | 0.117 | 0.593  | 0.261 | 0.009                 | 0.063 |

**Table S4: *p*- and R values for pair-wise group comparisons at the four study time points. (A) Sorensen-Dice (B) Bray Curtis. *p*-value < 0.05 is considered significant between the two groups. R-value > 0.5 indicates dissimilarities between the two groups.**

| <b>A</b>       |     |                       | Day -18 p.i.   |                | Day 0 p.i.     |                | Day 14 p.i.    |                | Day 28 p.i.    |                |
|----------------|-----|-----------------------|----------------|----------------|----------------|----------------|----------------|----------------|----------------|----------------|
|                |     |                       | <i>P value</i> | <i>R value</i> | <i>P value</i> | <i>R value</i> | <i>P value</i> | <i>R value</i> | <i>P value</i> | <i>R value</i> |
| Control        | vs. | <i>T. suis</i>        | 0.671          | 0.000          | 0.021          | 0.174          | 0.110          | 0.097          | 0.037          | 0.183          |
| Control        | vs. | Inulin                | 0.298          | 0.033          | 0.002          | 0.431          | 0.021          | 0.186          | 0.002          | 0.458          |
| Control        | vs. | Inulin+ <i>T.suis</i> | 0.865          | 0.000          | 0.002          | 0.353          | 0.001          | 0.401          | 0.001          | 0.899          |
| <i>T. suis</i> | vs. | Inulin                | 0.533          | 0.000          | 0.001          | 0.466          | 0.006          | 0.237          | 0.001          | 0.529          |
| <i>T. suis</i> | vs. | Inulin+ <i>T.suis</i> | 0.671          | 0.000          | 0.006          | 0.224          | 0.001          | 0.463          | 0.001          | 0.765          |
| Inulin         | vs. | Inulin+ <i>T.suis</i> | 0.016          | 0.228          | 0.632          | 0.000          | 0.215          | 0.053          | 0.005          | 0.322          |

  

| <b>B</b>       |     |                       | Day -18 p.i.   |                | Day 0 p.i.     |                | Day 14 p.i.    |                | Day 28 p.i.    |                |
|----------------|-----|-----------------------|----------------|----------------|----------------|----------------|----------------|----------------|----------------|----------------|
|                |     |                       | <i>P value</i> | <i>R value</i> | <i>P value</i> | <i>R value</i> | <i>P value</i> | <i>R value</i> | <i>P value</i> | <i>R value</i> |
| Control        | vs. | <i>T. suis</i>        | 0.889          | 0.000          | 0.035          | 0.233          | 0.261          | 0.040          | 0.106          | 0.122          |
| Control        | vs. | Inulin                | 0.262          | 0.029          | 0.002          | 0.486          | 0.031          | 0.217          | 0.003          | 0.461          |
| Control        | vs. | Inulin+ <i>T.suis</i> | 0.352          | 0.000          | 0.002          | 0.529          | 0.001          | 0.518          | 0.001          | 0.624          |
| <i>T. suis</i> | vs. | Inulin                | 0.220          | 0.050          | 0.003          | 0.370          | 0.016          | 0.266          | 0.002          | 0.646          |
| <i>T. suis</i> | vs. | Inulin+ <i>T.suis</i> | 0.427          | 0.000          | 0.005          | 0.319          | 0.004          | 0.395          | 0.001          | 0.578          |
| Inulin         | vs. | Inulin+ <i>T.suis</i> | 0.029          | 0.329          | 0.786          | 0.000          | 0.3815         | 0.002          | 0.095          | 0.156          |

**Table S5: *p*- and R values for time point comparisons within each group. (A) Sorensen-Dice index (B) Bray Curtis index. *p*-value < 0.05 is considered significant between the two time points. R-value > 0.5 indicates dissimilarities between the two groups. (C = control; Ts = *Trichuris suis*; I = Inulin; I+Ts = Inulin +*T. suis*).**

| A            |     |             | Control        |                | <i>T. suis</i> |                | Inulin         |                | Inulin+ <i>T.suis</i> |                |
|--------------|-----|-------------|----------------|----------------|----------------|----------------|----------------|----------------|-----------------------|----------------|
|              |     |             | <i>P</i> value | <i>R</i> value | <i>P</i> value | <i>R</i> value | <i>P</i> value | <i>R</i> value | <i>P</i> value        | <i>R</i> value |
| Day -18 p.i. | Vs. | Day 0 p.i.  | 0.002          | 0.292          | 0.001          | 0.379          | 0.001          | 0.710          | 0.001                 | 0.394          |
| Day -18 p.i. | Vs. | Day 14 p.i. | 0.003          | 0.332          | 0.001          | 0.438          | 0.001          | 0.558          | 0.001                 | 0.421          |
| Day -18 p.i. | Vs. | Day 28 p.i. | 0.003          | 0.353          | 0.001          | 0.568          | 0.001          | 0.615          | 0.001                 | 0.783          |
| Day 0 p.i.   | Vs. | Day 14 p.i. | 0.203          | 0.054          | 0.082          | 0.082          | 0.925          | 0.000          | 0.011                 | 0.190          |
| Day 0 p.i.   | Vs. | Day 28 p.i. | 0.183          | 0.068          | 0.004          | 0.232          | 0.116          | 0.093          | 0.002                 | 0.427          |
| Day 14 p.i.  | Vs. | Day 28 p.i. | 0.319          | 0030           | 0.097          | 0.081          | 0.264          | 0.037          | 0.009                 | 0.138          |

  

| B            |     |             | Control        |                | <i>T. suis</i> |                | Inulin         |                | Inulin+ <i>T.suis</i> |                |
|--------------|-----|-------------|----------------|----------------|----------------|----------------|----------------|----------------|-----------------------|----------------|
|              |     |             | <i>P</i> value | <i>R</i> value | <i>P</i> value | <i>R</i> value | <i>P</i> value | <i>R</i> value | <i>P</i> value        | <i>R</i> value |
| Day -18 p.i. | Vs. | Day 0 p.i.  | 0.005          | 0.452          | 0.001          | 0.477          | 0.001          | 0.626          | 0.001                 | 0.544          |
| Day -18 p.i. | Vs. | Day 14 p.i. | 0.002          | 0.589          | 0.001          | 0.515          | 0.011          | 0.377          | 0.001                 | 0.570          |
| Day -18 p.i. | Vs. | Day 28 p.i. | 0.027          | 0.289          | 0.002          | 0.400          | 0.001          | 0.533          | 0.001                 | 0.748          |
| Day 0 p.i.   | Vs. | Day 14 p.i. | 0.018          | 0.379          | 0.282          | 0.027          | 0.393          | 0.000          | 0.104                 | 0.117          |
| Day 0 p.i.   | Vs. | Day 28 p.i. | 0.049          | 0.228          | 0.235          | 0.033          | 0.195          | 0.072          | 0.057                 | 0.157          |
| Day 14 p.i.  | Vs. | Day 28 p.i. | 0.017          | 0.265          | 0.241          | 0.040          | 0.124          | 0.107          | 0.057                 | 0.160          |

**Table S6: *p*- and R values for pair-wise group comparisons at the four intestinal locations. (A)** Sorensen-Dice **(B)** Bray Curtis. *p*-value < 0.05 is considered significant between the two groups. R-value > 0.5 indicates dissimilarities between the two groups.

| <b>A</b>       |     |                       | Ileum          |                | Caecum         |                | Proximal colon |                | Distal colon   |                |
|----------------|-----|-----------------------|----------------|----------------|----------------|----------------|----------------|----------------|----------------|----------------|
|                |     |                       | <i>P value</i> | <i>R value</i> | <i>P value</i> | <i>R value</i> | <i>P value</i> | <i>R value</i> | <i>P value</i> | <i>R value</i> |
| Control        | Vs. | <i>T. suis</i>        | 0.002          | 0.422          | 0.031          | 0.173          | 0.015          | 0.227          | 0.002          | 0.450          |
| Control        | Vs. | Inulin                | 0.008          | 0.284          | 0.001          | 0.357          | 0.001          | 0.454          | 0.009          | 0.543          |
| Control        | Vs. | Inulin+ <i>T.suis</i> | 0.001          | 0.664          | 0.001          | 0.647          | 0.001          | 0.586          | 0.001          | 0.841          |
| <i>T. suis</i> | Vs. | Inulin                | 0.001          | 0.557          | 0.003          | 0.335          | 0.001          | 0.516          | 0.002          | 0.591          |
| <i>T. suis</i> | Vs. | Inulin+ <i>T.suis</i> | 0.002          | 0.747          | 0.001          | 0.611          | 0.001          | 0.531          | 0.001          | 0.702          |
| Inulin         | Vs. | Inulin+ <i>T.suis</i> | 0.002          | 0.317          | 0.077          | 0.128          | 0.538          | 0.000          | 0.413          | 0.004          |

  

| <b>B</b>       |     |                       | Ileum          |                | Caecum         |                | Proximal colon |                | Distal colon   |                |
|----------------|-----|-----------------------|----------------|----------------|----------------|----------------|----------------|----------------|----------------|----------------|
|                |     |                       | <i>P value</i> | <i>R value</i> | <i>P value</i> | <i>R value</i> | <i>P value</i> | <i>R value</i> | <i>P value</i> | <i>R value</i> |
| Control        | Vs. | <i>T. suis</i>        | 0.041          | 0.201          | 0.130          | 0.094          | 0.055          | 0.167          | 0.043          | 0.250          |
| Control        | Vs. | Inulin                | 0.002          | 0.503          | 0.003          | 0.458          | 0.003          | 0.391          | 0.013          | 0.490          |
| Control        | Vs. | Inulin+ <i>T.suis</i> | 0.001          | 0.828          | 0.003          | 0.461          | 0.002          | 0.478          | 0.002          | 0.736          |
| <i>T. suis</i> | Vs. | Inulin                | 0.007          | 0.414          | 0.003          | 0.343          | 0.008          | 0.309          | 0.005          | 0.393          |
| <i>T. suis</i> | Vs. | Inulin+ <i>T.suis</i> | 0.001          | 0.664          | 0.003          | 0.443          | 0.006          | 0.298          | 0.001          | 0.525          |
| Inulin         | Vs. | Inulin+ <i>T.suis</i> | 0.044          | 0.145          | 0.154          | 0.087          | 0.686          | 0.000          | 0.371          | 0.014          |



**Table S7: *p*- and R values for pair-wise comparisons within each group for gut segments. (A) Sorensen-Dice index (B) Bray Curtis index. *p*-value < 0.05 is considered significant between the two groups. R-value > 0.5 indicates dissimilarities between the two segments.**

| <b>A</b>       |     |                | <b>Control</b> |                | <b><i>T. suis</i></b> |                | <b>Inulin</b>  |                | <b>Inulin+ <i>T.suis</i></b> |                |
|----------------|-----|----------------|----------------|----------------|-----------------------|----------------|----------------|----------------|------------------------------|----------------|
|                |     |                | <i>P value</i> | <i>R value</i> | <i>P value</i>        | <i>R value</i> | <i>P value</i> | <i>R value</i> | <i>P value</i>               | <i>R value</i> |
| Ileum          | Vs. | Caecum         | 0.002          | 0.826          | 0.001                 | 0.658          | 0.002          | 0.667          | 0.001                        | 0.802          |
| Ileum          | Vs. | Proximal colon | 0.002          | 0.867          | 0.001                 | 0.708          | 0.002          | 0.784          | 0.001                        | 0.881          |
| Ileum          | Vs. | Distal colon   | 0.002          | 0.899          | 0.001                 | 0.819          | 0.003          | 0.605          | 0.001                        | 1.000          |
| Caecum         | Vs. | Proximal colon | 0.942          | 0.000          | 0.879                 | 0.000          | 0.963          | 0.000          | 0.873                        | 0.000          |
| Caecum         | Vs. | Distal colon   | 0.009          | 0.244          | 0.224                 | 0.039          | 0.105          | 0.090          | 0.001                        | 0.359          |
| Proximal colon | Vs. | Distal colon   | 0.017          | 0.257          | 0.066                 | 0.103          | 0.770          | 0.000          | 0.006                        | 0.230          |

  

| <b>B</b>       |     |                | <b>Control</b> |                | <b><i>T. suis</i></b> |                | <b>Inulin</b>  |                | <b>Inulin+ <i>T.suis</i></b> |                |
|----------------|-----|----------------|----------------|----------------|-----------------------|----------------|----------------|----------------|------------------------------|----------------|
|                |     |                | <i>P value</i> | <i>R value</i> | <i>P value</i>        | <i>R value</i> | <i>P value</i> | <i>R value</i> | <i>P value</i>               | <i>R value</i> |
| Ileum          | Vs. | Caecum         | 0.001          | 0.843          | 0.001                 | 0.725          | 0.001          | 0.810          | 0.001                        | 0.900          |
| Ileum          | Vs. | Proximal colon | 0.002          | 0.812          | 0.001                 | 0.784          | 0.002          | 0.747          | 0.001                        | 0.876          |
| Ileum          | Vs. | Distal colon   | 0.001          | 0.953          | 0.001                 | 0.788          | 0.002          | 0.564          | 0.001                        | 0.964          |
| Caecum         | Vs. | Proximal colon | 0.811          | 0.000          | 0.998                 | 0.000          | 0.460          | 0.000          | 0.697                        | 0.000          |
| Caecum         | Vs. | Distal colon   | 0.023          | 0.312          | 0.078                 | 0.117          | 0.013          | 0.209          | 0.035                        | 0.223          |
| Proximal colon | Vs. | Distal colon   | 0.042          | 0.259          | 0.115                 | 0.084          | 0.168          | 0.077          | 0.050                        | 0.189          |

**Figure S3: Heatmap of significant differentially abundant taxa between the four treatment groups found by ANCOM at four time points.** Heatmap of significant different log abundance of faecal taxa at day -18 post-infection (p.i.), day 0 p.i., day 14 p.i. and day 28 p.i. Only taxa found to be significantly different by ANCOM ( $p < 0.05$ ) between two or more groups are included. X denotes no difference in abundance in the segment, not non-presence. (C = control; Ts = *Trichuris suis*; I = Inulin; I+Ts = Inulin + *T. suis*).

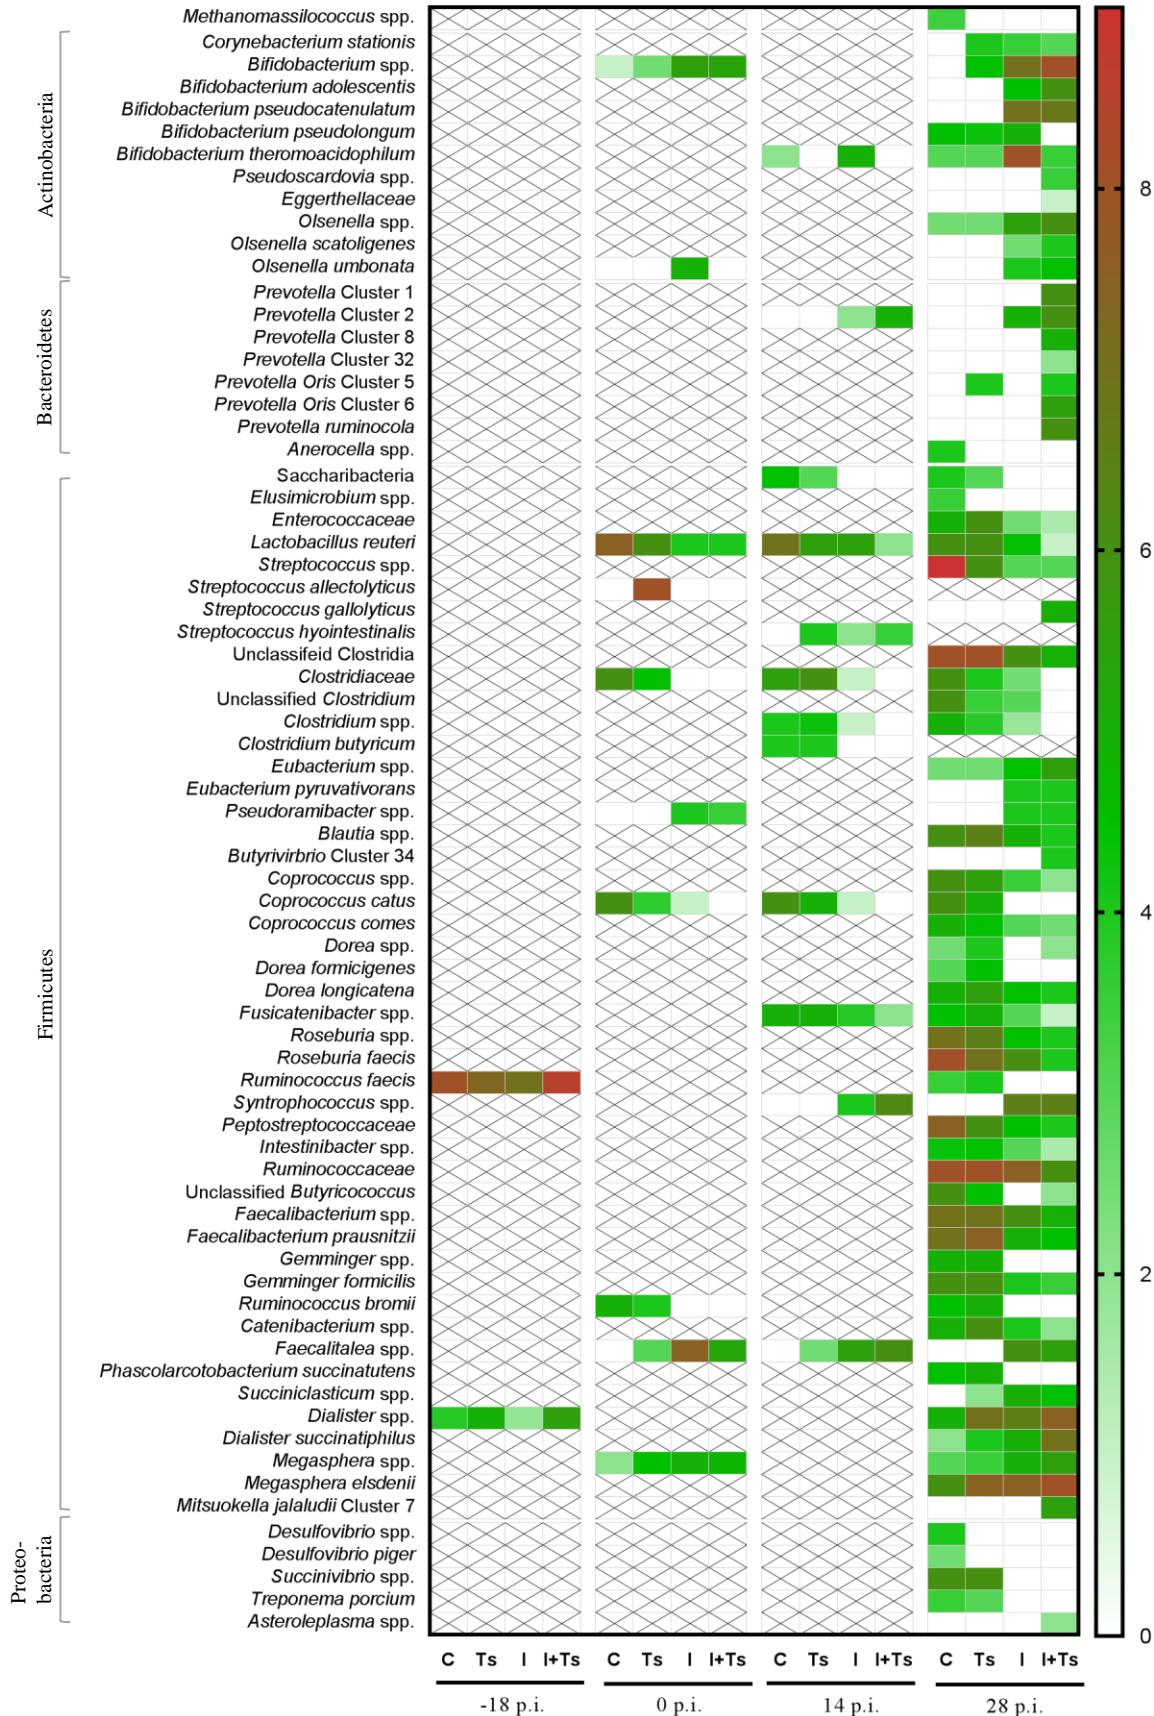

Supplement: Supplementary file [file 21900741]
